# Supplementary material
Source: HighWire-hosted journal article supplement (https://bmjopenrespres.bmj.com/content/11/1/e001929)
Supplement: inline-supplementary-material-2 [file inline-supplementary-material-2.pdf]

## SUPPLEMENTAL APPENDIX 2

|                               |               | Adjusted |         |
|-------------------------------|---------------|----------|---------|
|                               |               | HR       | CI      |
| Inhaled corticosteroid group† |               |          |         |
|                               | None          | ref.     | -       |
|                               | Low dose      | 2.6      | 1.6-4.0 |
|                               | Moderate dose | 3.0      | 1.9-4.6 |
|                               | High dose     | 5.7      | 3.8-8.5 |
| Sex                           |               |          |         |
|                               | Female        | ref.     | -       |
|                               | Male          | 1.0      | 0.8-1.2 |
| Smoking status                |               |          |         |
|                               | Former smoker | ref.     | -       |
|                               | Active smoker | 0.8      | 0.6-0.9 |
| Oral corticosteroid group‡    |               |          |         |
|                               | None          | ref.     | -       |
|                               | Low           | 1.1      | 0.8-1.6 |
|                               | High          | 1.8      | 1.5-2.2 |
| FEV1*                         |               | 0.8      | 0.7-0.8 |
| BMI*                          |               | 0.8      | 0.8-0.9 |
| Age**                         |               | 1.1      | 1.0-1.2 |

Table 3. Risk factors for acquisition of *S. maltophilia* in COPD outpatients. HR: hazard ratio, CI: 95% confidence interval, FEV1: forced expired volume in the first second, MRC: Medical Research Council dyspnoea scale, BMI: body mass index, †Inhaled corticosteroid cumulated daily dose in budesonide equivalents, none: no use, low dose:  $\leq 400$   $\mu\text{g}$ , moderate dose

---

400-800 µg, high dose: > 800 µg. ‡ Oral corticosteroids accumulated dose 365 prior to study entry, none: no use, low dose: ≤ 250 mg prednisolone, high dose: > 250 mg prednisolone, \*HR per 10 percentage points increase, †HR per 5 kg/m<sup>2</sup> increase, \*\*HR per 10 years increase.
